# Supplementary material for: A Study among the Genotype, Functional Alternations, and Phenotype of 9 SCN1A Mutations in Epilepsy Patients
Source: PubMed Central journal article supplement (PMC7314844; doi:10.1038/s41598-020-67215-y), 2020-06-24
Supplement: 41598_2020_67215_MOESM1_ESM.pdf [file 41598_2020_67215_MOESM1_ESM.pdf]

# **A Study among the Genotype, Functional Alternations, and Phenotype of 9 *SCN1A* Mutations in Epilepsy Patients**

**Daniela Kluckova<sup>1</sup>, Miriam Kolnikova<sup>2</sup>, Lubica Lacinova<sup>3</sup>, Bohumila Jurkovicova-Tarabova<sup>3</sup>, Tomas Foltan<sup>2</sup>, Viktor Demko<sup>4</sup>, Ludevit Kadasi<sup>1,5</sup>, Andrej Ficek<sup>1</sup>, Andrea Soltysova<sup>1,5\*</sup>**

<sup>1</sup>Department of Molecular Biology, Faculty of Natural Sciences, Comenius University, Ilkovicova 6 Bratislava, 842 15 Slovakia

<sup>2</sup>Department of Pediatric Neurology, Comenius University Medical School and National Institute of Children's Diseases, Bratislava, Slovakia

<sup>3</sup>Center of Biosciences, Institute of Molecular Physiology and Genetics, Slovak Academy of Sciences, Bratislava, Slovakia

<sup>4</sup>Department of Plant Physiology, Faculty of Natural Sciences, Comenius University, Ilkovicova 6 Bratislava, 842 15 Slovakia

<sup>5</sup>Institute for Clinical and Translational Research, Biomedical Research Center, Slovak Academy of Sciences, Dubravska cesta 9, 845 05 Bratislava, Slovakia

## **\*Corresponding author**

Andrea Soltysova, Department of Molecular Biology, Faculty of Natural Sciences, Comenius University, Ilkovicova 6, Bratislava, 842 15 Slovakia, Phone number: +421 2 9014 2050, [andrea.soltysova@uniba.sk](mailto:andrea.soltysova@uniba.sk)

ORCID number: Daniela Kluckova 0000-0003-3946-7663  
Andrea Soltysova 0000-0002-1402-3583

## Supporting information

**Supplementary Table 1 Summary of the studied SCN1A variants and used mutagenesis primers.**

| Variant       | Longer transcript<br>ENST00000303395.8 |                     | Shorter transcript<br>ENST00000637988.1 |                | Region     | Mutagenesis primers (5' - 3')                               |
|---------------|----------------------------------------|---------------------|-----------------------------------------|----------------|------------|-------------------------------------------------------------|
|               | cDNA position                          | Protein change      | cDNA position                           | Protein change |            |                                                             |
| <b>D249E</b>  | <b>c.747T&gt;G</b>                     | <b>p.Asp249Glu</b>  | c.747T>G                                | p.Asp249Glu    | DIS4-S5    | GAAGCTCTCAGAGGTAATGATCCT<br>TTCACAGACTGGATCAGGGCT           |
| <b>E788K</b>  | <b>c.2362G&gt;A</b>                    | <b>p.Glu788Lys</b>  | c.2329G>A                               | p.Glu777Lys    | DIIS1-S2   | ATGGCCATGGAGCACTATCCA<br>GAAAAGAGTATTTAAGACAATACAGATGGT     |
| <b>W384*</b>  | <b>c.1151G&gt;A</b>                    | <b>p.Trp384*</b>    | c.1151G>A                               | p.Trp384*      | DIS5-S6    | GACTCAGGACTTCTAGGAAAATCTTTATC<br>ATTAGTCGAAACAAGGACAAAAAAGC |
| <b>E78D</b>   | <b>c.234G&gt;T</b>                     | <b>p.Glu78Asp</b>   | c.234G>T                                | p.Glu78Asp     | N-terminal | CAGAGCCCTGGATGACCTGGACC<br>ACACCATCTCTGGAGGAATGT            |
| <b>T1934I</b> | <b>c.5801C&gt;T</b>                    | <b>p.Thr1934Ile</b> | c.5768C>T                               | p.Thr1923Ile   | C-terminal | TTTAAAGCGAATTGTAAAAACAAGC<br>AGGTGGCGTCTGTAAGCAC            |
| <b>R1596C</b> | <b>c.4786C&gt;T</b>                    | <b>p.Arg1596Cys</b> | c.4753C>T                               | p.Arg1585Cys   | DIVS2-S3   | AACTCATCTCTATGCCATTATTATTT<br>TCAGTACACACTCTCCAGTAAATAGC    |
| <b>M909K</b>  | <b>c.2726T&gt;A</b>                    | <b>p.Met909Lys</b>  | c.2693T>A                               | p.Met898Lys    | DIIS5      | CCGTGGTCGGCAAGCAGCTCTTTGGT<br>CAAAAATGAAGACGATGATGGCCAAG    |
| <b>E78*</b>   | <b>c.232G&gt;T</b>                     | <b>p.Glu78*</b>     | c.232G>T                                | p.Glu78*       | N-terminal | CAGAGCCCTGTAGGACCTGGAC<br>ACACCATCTCTGGAGGAATGT             |
| <b>E1587K</b> | <b>c.4759G&gt;A</b>                    | <b>p.Glu1587Lys</b> | c.4726G>A                               | p.Glu1576Lys   | DIVS2      | GCTATTTACTGGAAAGTGTGTACTGAA<br>ACAATGAACACCAGATTGATGCGT     |
